# Supplementary material for: Electrocatalytic nitrate reduction to ammonia via amorphous cobalt boride
Source: Royal Society of Chemistry journal article supplement (doi:10.1039/d2cc02261c), 2022-01-01
Supplement: d2cc02261c1.pdf [file d2cc02261c1.pdf]

## **Electronic Supplementary Information**

### **Electrocatalytic nitrate reduction to ammonia via amorphous cobalt boride**

Yongbin Shi,<sup>a</sup> Suxian Xu<sup>a</sup> and Fei Li<sup>\*a</sup>

<sup>a</sup> State Key Laboratory of Fine Chemicals, DUT-KTH Joint Education and Research  
Centre on Molecular Devices, Dalian University of Technology, Dalian, 116024,  
China.

E-mail: lifei@dlut.edu.cn

## Experimental section

### Chemicals

Cobalt (II) chloride hexahydrate ( $\text{CoCl}_2 \cdot 6\text{H}_2\text{O}$ ), Sodium borohydride ( $\text{NaBH}_4$ ), Potassium hydroxide ( $\text{KOH}$ ), Sodium citrate dihydrate ( $\text{C}_6\text{H}_5\text{Na}_3\text{O}_7 \cdot 2\text{H}_2\text{O}$ ), Salicylic acid ( $\text{C}_7\text{H}_6\text{O}_3$ ), Sodium hydroxide ( $\text{NaOH}$ ), Ammonium chloride ( $\text{NH}_4\text{Cl}$ ), Potassium nitrate- $\text{N}^{15}$  ( $\text{K}^{15}\text{NO}_3$ ), Hydrazine standard solution (analytical standard,  $1000 \mu\text{g mL}^{-1}$ ), Sodium nitroprusside dihydrate ( $\text{C}_5\text{FeN}_6\text{Na}_2\text{O} \cdot 2\text{H}_2\text{O}$ ), Sulfanilamide ( $\text{C}_6\text{H}_8\text{N}_2\text{O}_2\text{S}$ ), N-(1-naphthyl) ethylenediamine dihydrochloride ( $\text{C}_{12}\text{H}_{14}\text{N}_2 \cdot 2\text{HCl}$ ), p-Dimethylaminobenzaldehyde ( $\text{C}_9\text{H}_{11}\text{NO}$ ), 1,10-Phenanthroline ( $\text{C}_{12}\text{H}_8\text{N}_2$ ), Ammonium Ferric Sulfate Solution ( $\text{FeH}_4\text{NO}_8\text{S}_2, 5\%$ ), and Sodium acetate ( $\text{CH}_3\text{COONa}$ ) were purchased from Macklin chemical company and without any further purification. Ethanol, hydrochloric acid, Phosphoric acid, Sulfuric acid, Potassium nitrate ( $\text{KNO}_3$ ), and sodium hypochlorite solution ( $\text{pCl} \geq 10.0\%$ ) were analytical pure and obtained from commercial supplier. The carbon paper (CP) was purchased from TORAY Industries, Japan. Millipore water (resistivity: ca.  $18 \text{ M}\Omega \text{ cm}$ ) was applied to prepare the electrolyte solution.

### Preparation of $\text{CoB}_x$ nanoparticles<sup>1</sup>

The amorphous cobalt boride nanoparticles were synthesized by chemical reduction method. Due to a large amount of hydrogen was generated during the reaction, the entire synthesis process was carried out in a fume hood. In a typical synthesis,  $0.2 \text{ g CoCl}_2 \cdot 6\text{H}_2\text{O}$  was completely dissolved in  $2 \text{ mL}$  deionized water to form solution A.  $0.3783 \text{ g NaBH}_4$  was added to  $2 \text{ mL}$  deionized water to form solution B. Both the solution A and B were kept in the ice bath for  $20 \text{ min}$ . Then solution B was slowly dropped into solution A and a lot of bubbles were quickly generated. The reaction lasted for about  $60 \text{ minutes}$  until there were no bubbles generated. The black precipitate was collected by centrifugation and extensively washed with deionized water and ethanol to remove any traces of unreacted ions. The black powder was obtained by freeze drying overnight and was stored in a glove box to prevent oxidation.

## **Preparation of metallic Co nanoparticles<sup>2</sup>**

The entire synthesis process was carried out in a fume hood. 1.0 g  $\text{CoCl}_2 \cdot 6\text{H}_2\text{O}$  was added to 7.5 mL of ethanol. A white slurry prepared by mixing 2.5 g of NaOH with 5 mL of 50%  $\text{N}_2\text{H}_4 \cdot \text{H}_2\text{O}$  solution was added to the above solution under magnetic stirring. The produced precipitate was washed with a lot of deionized water and ethanol. The grey powder was obtained by freeze drying overnight and was stored in a glove box to prevent oxidation.

## **Preparation of the working electrodes**

5 mg of catalyst and 40  $\mu\text{L}$  of 5 wt.% Nafion solution were dispersed in 960  $\mu\text{L}$  ethanol with ultrasonically for 60 min to form a homogeneous ink. Then, 40  $\mu\text{L}$  of ink was coated on carbon paper (CP,  $1 \times 0.5 \text{ cm}^2$ ), which will be dried at room temperature. The obtained mass loading was  $0.4 \text{ mg cm}^{-2}$ .

## **Characterization**

X-ray diffraction (XRD) pattern was obtained on D/max-2400 diffractometer (Japan Rigaku Rotaflex) with  $\text{Cu K}\alpha$  radiation ( $\lambda = 154.1 \text{ \AA}$ ) to obtain the crystal structure. The morphology of as-prepared catalysts was studied by Ultrahigh Resolution Field Emission Scanning Electron Microscopy (FESEM, JSM-7900F) equipped with energy-dispersive X-ray spectroscopy (EDX). The selective area electron diffraction (SAED) and microstructure of the materials were characterized by transmission electron microscopy (TEM, FEI TF 30). The element composition and states of the materials were performed by X-ray photoelectron spectroscopy (XPS) (Thermo Scientific ESCALAB 250). Specially, the binding energy was standardized concerning to the C 1s peak at 284.7 eV.  $^1\text{H-NMR}$  spectra were collected at 298K using Bruker DRX-600 NMR. UV-Vis absorption spectra were recorded on a UV-Vis spectrophotometer (Shimadazu, UV-1800). Inductively coupled plasma atomic emission spectrometer (ICP-AES) was performed on a PerkinElmer model AVIO 500.

## **Electrochemical measurements**

All electrochemical measurements were conducted on a CHI 660E

electrochemical workstation (Shanghai Chenhua Instrument Co., Ltd) with a three-electrode system at room temperature. The reaction was assessed using a gas-tight, two-compartment cell separated by a Nafion membrane (Nafion 117). In a typical test, the CP depositing with catalyst was used as the working electrode, Hg/HgO as a reference electrode was placed in the cathode chamber, while in the anode, the platinum mesh electrode was served as the counter electrode. Electrolyte solution (30 mL) was Ar-saturated of 0.1 M KOH with 0.05 M KNO<sub>3</sub> and was evenly distributed to the cathode and anode compartments. Before the experiment, the Nafion membrane was treated in H<sub>2</sub>O<sub>2</sub> (5%) aqueous solution at 80 °C for 2 h. Then, the membrane was boiled in 0.5 M H<sub>2</sub>SO<sub>4</sub> aqueous solution for 2 h at 80 °C, and subsequently boiled in deionized water for 2 h at 80 °C.

All potentials mentioned in this work correspond to the reversible hydrogen electrode potential (RHE), where  $E_{\text{RHE}} = E_{\text{Hg/HgO}} + 0.0591\text{pH} + E^{\theta}_{\text{Hg/HgO}}$ . The current densities were normalized to the geometric area of the working electrode unless otherwise stated. The entire electrolysis had sustained for 1 h under a certain potential. The linear sweep voltammetry (LSV) at a scan rate of 5 mV/s.

The turnover frequency (TOF) was calculated using the following formula:  $\text{TOF} = jA / 8nF$ , where  $j$  is the current density at an overpotential of -0.9 V vs. RHE,  $A$  is the geometric area of the working electrode, 8 is the number of electrons transferred to produce one molecule of ammonia,  $n$  is the number of moles of active sites, and  $F$  is Faraday constant (96485 C mol<sup>-1</sup>).<sup>3</sup>

## Determination of ion concentration

The indophenols blue method and ammonia-selective electrode analysis were applied to determine the production of ammonia, nitrite was tested by colorimetric method, hydrazine was evaluated by the Watt and Chrisp method, and hydroxylamine was tested by colorimetric method.

## Determination of NH<sub>4</sub><sup>+</sup>

### a) Indophenols blue method<sup>4</sup>

Typically, a certain amount of electrolyte was taken out from the cathode chamber

and diluted to 2 mL with deionized water. The diluted electrolyte mixed with 2 mL 1.0 M NaOH solution containing salicylic acid (5 wt%) and sodium citrate (5 wt%), 1 mL 0.05 M NaClO and 200  $\mu$ L 1 wt% sodium nitroprusside dihydrate aqueous solution. The mixture was stood for 2 h to ensure complete color development. The absorbance of the mixture was measured with UV-vis absorption spectrum at 655 nm. The concentration-absorbance curve was calibrated using a series of standard ammonium chloride solutions.

#### **b) Ammonia-selective electrode method**

20 mL of electrolyte was pipetted from the post-electrolysis electrolyte and mixed with 0.2 mL of Ionic Strength Adjuster (ISA). The measurement was then recorded using an ammonia ion selective electrode (at least 2 minutes are necessary to get stable readings).

#### **Determination of $\text{NO}_2^{-5}$**

A mixture of p-aminobenzenesulfonamide (2 g), N-(1-Naphthyl) ethylenediamine dihydrochloride (0.1 g), ultrapure water (25 mL) and phosphoric acid (5 mL,  $\rho=1.70$  g/mL) was used as a color reagent. A certain amount of electrolyte was taken out from the cathode chamber and diluted to 5 mL with deionized water. Next, 0.1 mL color reagent was added into the aforementioned 5 mL solution and mixed uniformly, and the absorption intensity at a wavelength of 540 nm was recorded after sitting for 20 min. The concentration-absorbance curve was calibrated using a series of standard sodium nitrite solutions.

#### **Determination of hydrazine<sup>4</sup>**

Briefly, a mixture of 5.99 g of p-C<sub>9</sub>H<sub>11</sub>NO, 30 mL of concentrated HCl, and 300 mL of ethanol was applied as a color reagent. 2 mL of post-electrolysis electrolyte and 2 mL of color reagent mixed and stirred for 10 min at room temperature. The resulting solutions were measured with UV-vis absorption spectra at 455 nm.

#### **Determination of hydroxylamine<sup>6</sup>**

The quantification of NH<sub>2</sub>OH was based on its reduction of Fe<sup>3+</sup> to Fe<sup>2+</sup>, the latter forms an orange complex with 1,10-phenanthroline. In detail, 100  $\mu$ L of an aqueous

acetate buffer (1 M sodium acetate and 1 M acetic acid mixture), 100  $\mu\text{L}$  of a 4 mM ammonium ferric sulfate aqueous solution and 100  $\mu\text{L}$  of a 10 mM 1,10-phenanthroline ethanolic solution were sequentially added into 3mL of the sample. The resulting solutions were measured with UV-Vis absorption spectra on the basis of their maximum absorbance at 510 nm, and the concentration was quantified by the calibration curve, which was established using a series of standard samples with known concentrations of hydroxylamine.

### Calculations of the $\text{NH}_3$ yield rate, $\text{NH}_3$ Faradaic Efficiency and $\text{NO}_2^-$ Faradaic Efficiency of NitRR:

The  $\text{NH}_3$  yield rate and faradic efficiency were calculated by the following equations:

$$\text{NH}_3 \text{ yield rate} = \frac{C_{\text{NH}_3} \times V}{M_{\text{NH}_3} \times t \times S}$$

$$FE_{\text{NH}_3} = \frac{8F \times C_{\text{NH}_3} \times V}{M_{\text{NH}_3} \times Q} \times 100\%$$

The  $\text{NO}_2^-$  faradic efficiency were calculated by the following equations:

$$FE_{\text{NO}_2^-} = \frac{2F \times C_{\text{NO}_2^-} \times V}{M_{\text{NO}_2^-} \times Q} \times 100\%$$

Where  $C_{\text{NH}_3}$  is the measured average  $\text{NH}_3$  mass concentration,  $V$  is the volume of the electrolyte (30 mL),  $M_{\text{NH}_3}$  is the molar mass of  $\text{NH}_3$ ,  $t$  is the reaction time (1 h),  $S$  is the geometric area of working electrode ( $0.5 \text{ cm}^2$ ),  $F$  is the Faraday constant ( $96485 \text{ C mol}^{-1}$ ), and  $Q$  is the total charge passed through the electrode,  $C_{\text{NO}_2^-}$  is the measured average  $\text{NO}_2^-$  mass concentration,  $M_{\text{NO}_2^-}$  is the molar mass of  $\text{NO}_2^-$ .

### $^{15}\text{N}$ isotopic experiment

The  $^{15}\text{N}$  isotopic labeled experiment was operated to clarify the source of ammonia by using the  $^{15}\text{N}$  isotopic ( $\text{K}^{15}\text{NO}_3$ , 99.99%). 0.1 M KOH containing 0.05M  $\text{K}^{15}\text{NO}_3$  was used as electrolyte. After electroreduction, 2 mL electrolyte was extracted from the

cathode compartment and the pH value was adjusted to be weak acid with 8 M HCl. Then, 0.6 mL  $d^6$ -DMSO was added to 50  $\mu$ L the aforementioned mixed solution for further characterization by  $^1\text{H}$  NMR (600 MHz). The  $^1\text{H}$  NMR (600 MHz) spectra of electrolyte adopting  $\text{K}^{15}\text{NO}_3$  as reactants showed typical double peaks of  $^{15}\text{NH}_4^+$ , while the  $^1\text{H}$  NMR (600 MHz) spectra of electrolyte adopting  $\text{K}^{14}\text{NO}_3$  as reactants showed typical triple peaks of  $^{14}\text{NH}_4^+$ . This result reveals that the produced ammonium is completely derived from nitrate reduction.

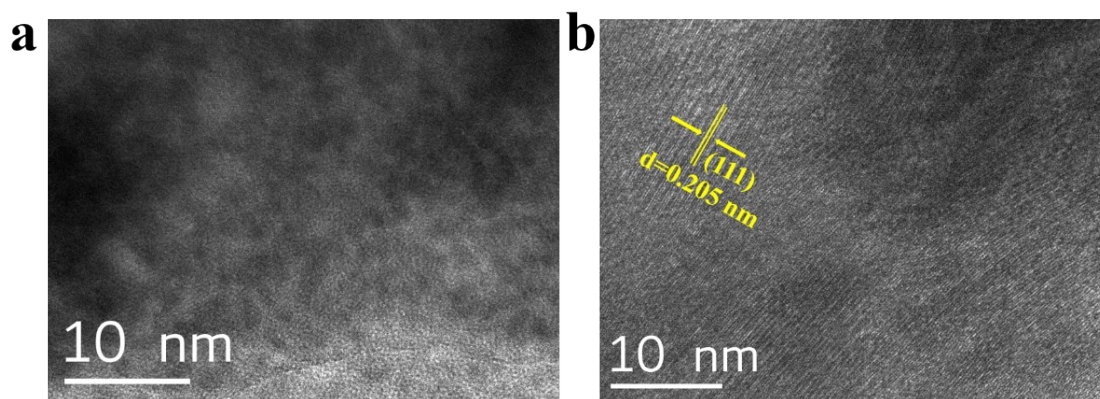

**Fig. S1** HR-TEM images of (a)  $\text{CoB}_x$  and (b) Co nanoparticles.

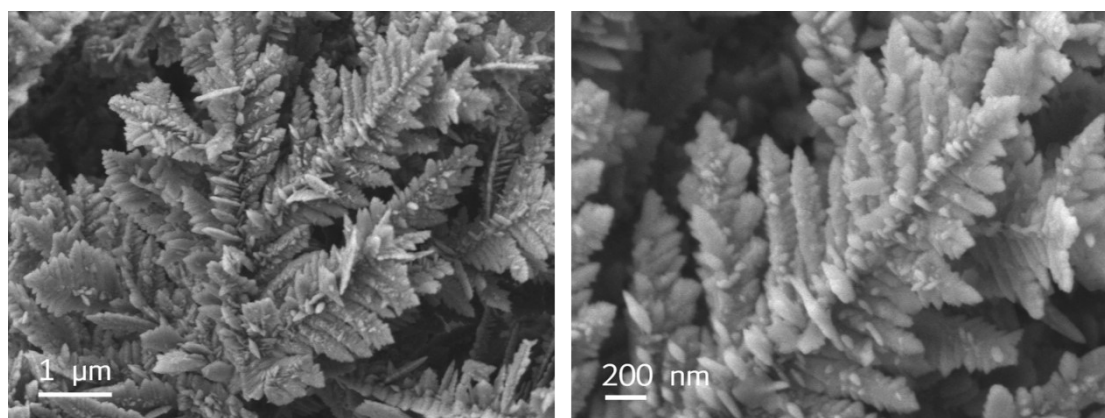

**Fig. S2** SEM images of Co.

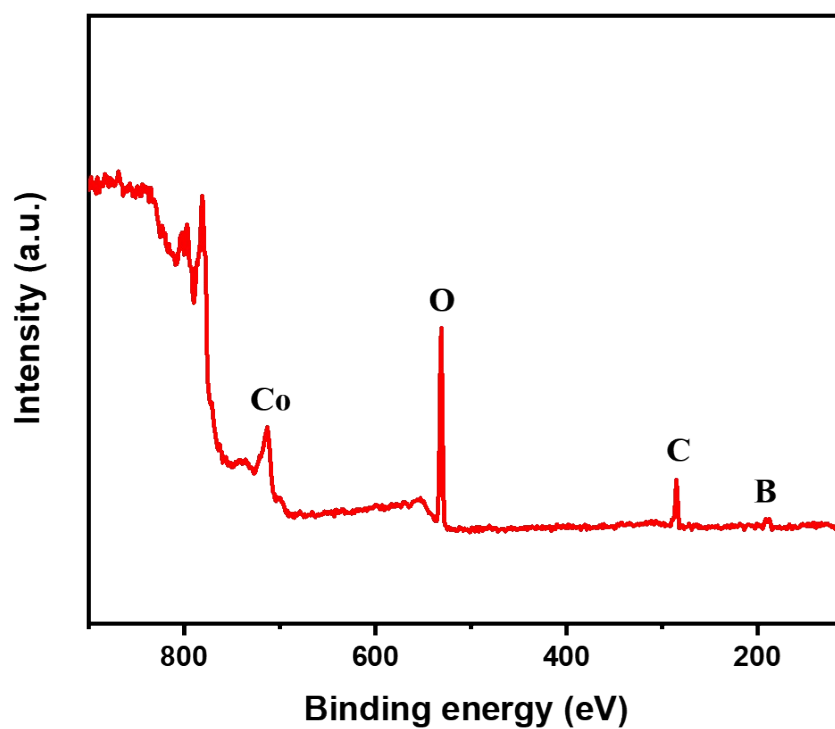

**Fig. S3** XPS survey spectra of  $\text{CoB}_x$ .

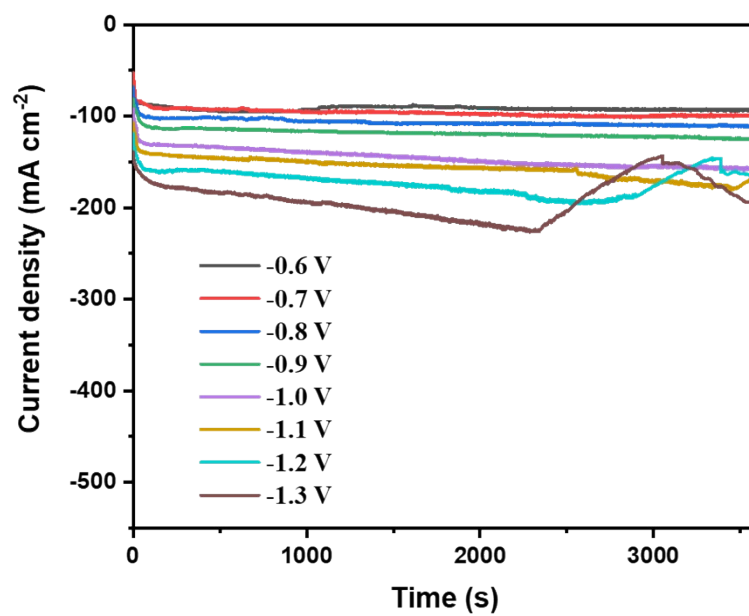

**Fig. S4** Chronoamperometric curves of  $\text{CoB}_x$  at various potentials.

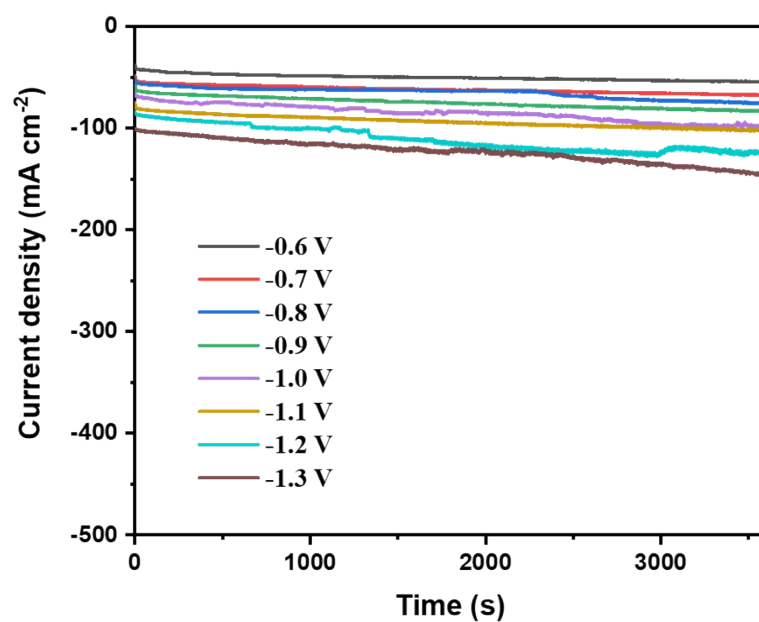

**Fig. S5** Chronoamperometric curves of Co at various potentials.

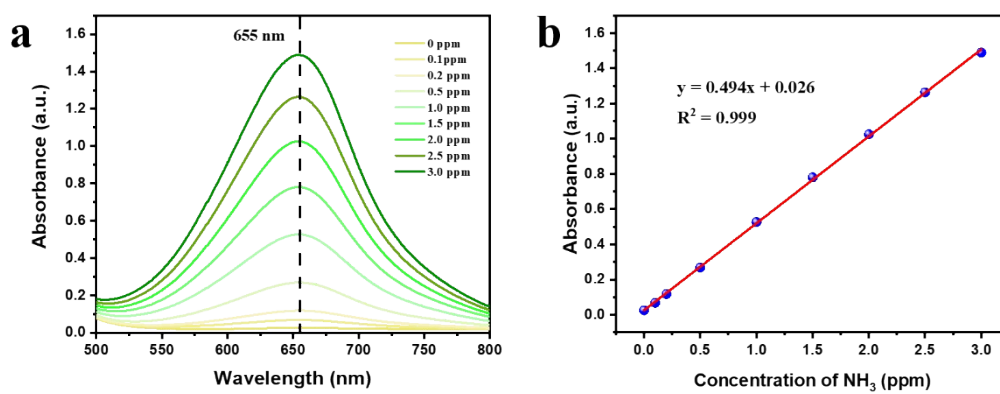

**Fig. S6** (a) UV-Vis absorption spectra of various  $\text{NH}_3$  concentrations after incubated for 2 h at room temperature. (b) Calibration curve used for calculation of  $\text{NH}_3$  concentrations.

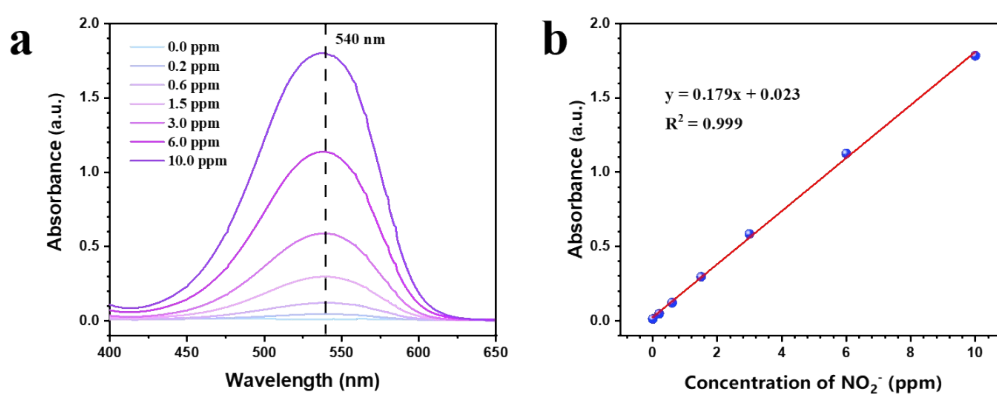

**Fig. S7** (a) UV-Vis spectra of various  $\text{NO}_2^-$  concentrations after incubated for 20 min at room temperature. (b) Calibration curve used for estimating the concentrations of  $\text{NO}_2^-$ .

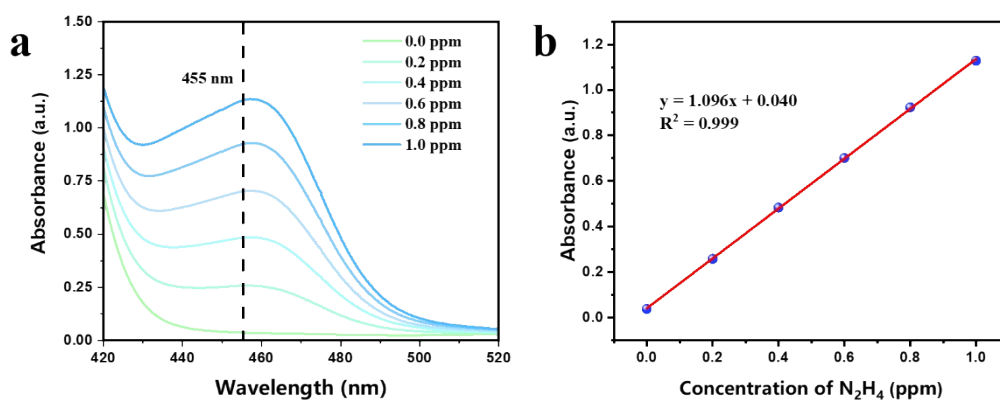

**Fig. S8** (a) UV-Vis absorption spectra at various  $\text{N}_2\text{H}_4$  concentrations after incubated for 10 min at room temperature. (b) Calibration curve used for calculation of  $\text{N}_2\text{H}_4$  concentrations.

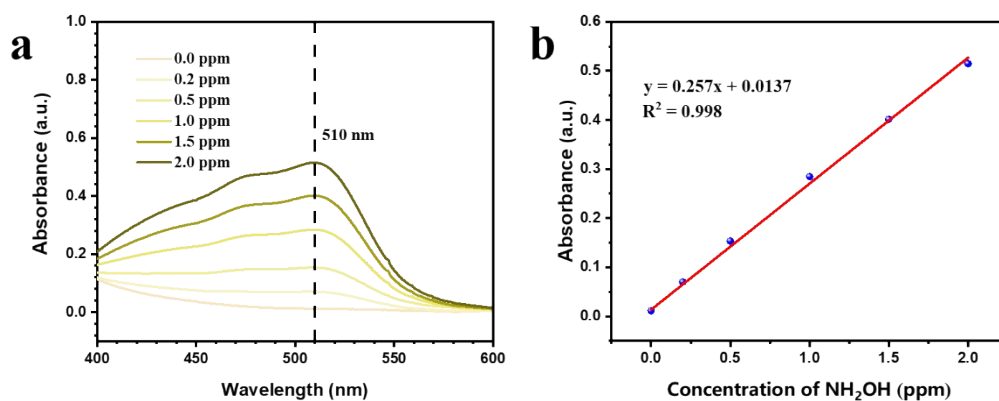

**Fig. S9** (a) UV-Vis absorption spectra at various  $\text{NH}_2\text{OH}$  concentrations after incubated for 10 min at room temperature. (b) Calibration curve used for calculation of  $\text{NH}_2\text{OH}$  concentrations.

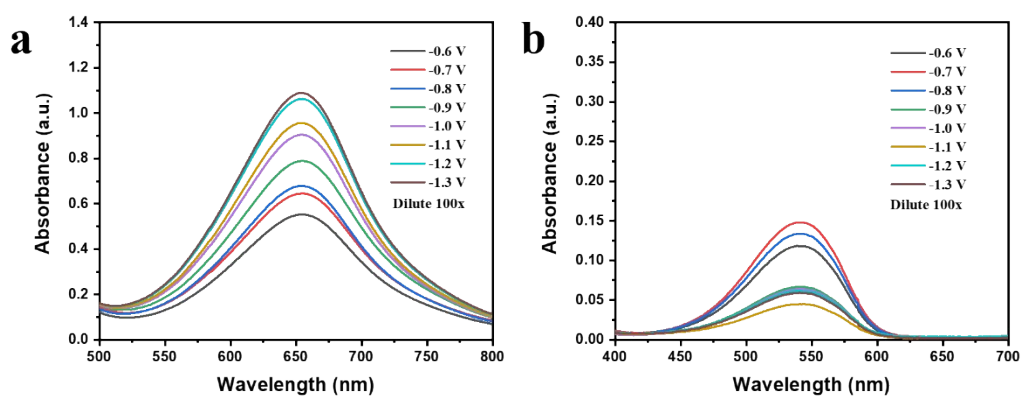

**Fig. S10** UV-Vis absorption spectra of the 0.1 M KOH electrolytes with 0.05 M  $\text{KNO}_3$  (after electrolysis with  $\text{CoB}_x$  catalysts at different applied potentials for 1 h) after incubated for (a) 2 h and (b) 20 min at room temperature, respectively.

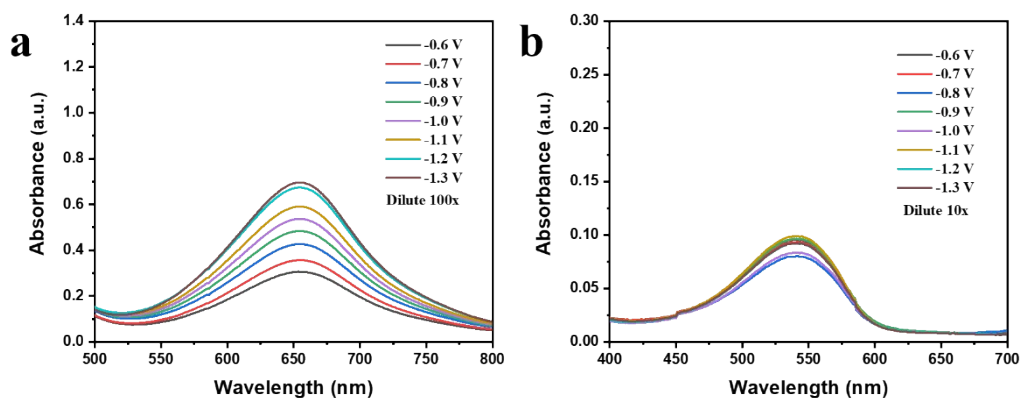

**Fig. S11** UV-Vis absorption spectra of the 0.1 M KOH electrolytes with 0.05 M KNO<sub>3</sub> (after electrolysis with Co catalysts at different applied potentials for 1 h) after incubated for (a) 2 h and (b) 20 min at room temperature, respectively.

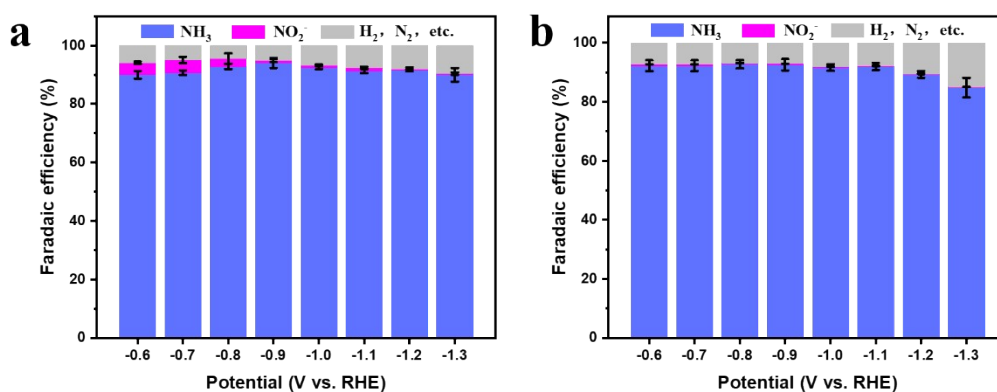

**Fig. S12** Selectivity of (a) CoB<sub>x</sub> and (b) Co at different given potentials. (Error bars were derived from experimental results of three independent samples)

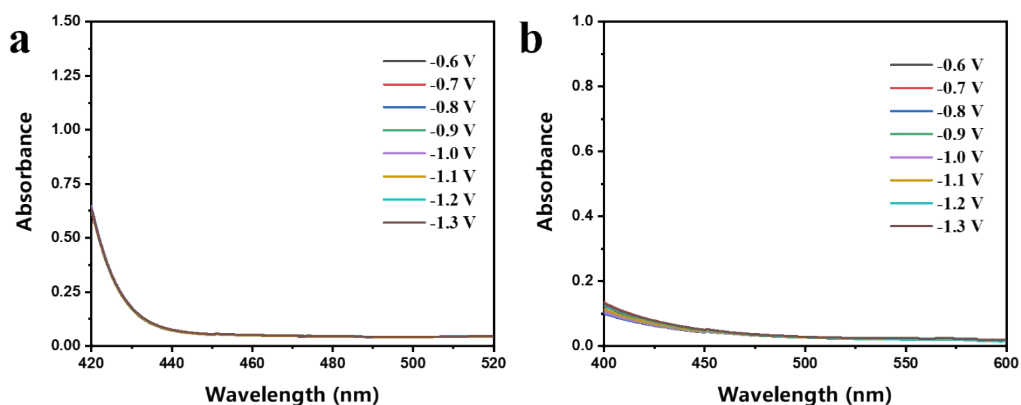

**Fig. S13** UV-Vis absorption spectra of the 0.1 M KOH electrolytes with 0.05 M KNO<sub>3</sub>

(after electrolysis with  $\text{CoB}_x$  catalysts at different applied potentials for 1 h) after incubated for 10 min at room temperature.

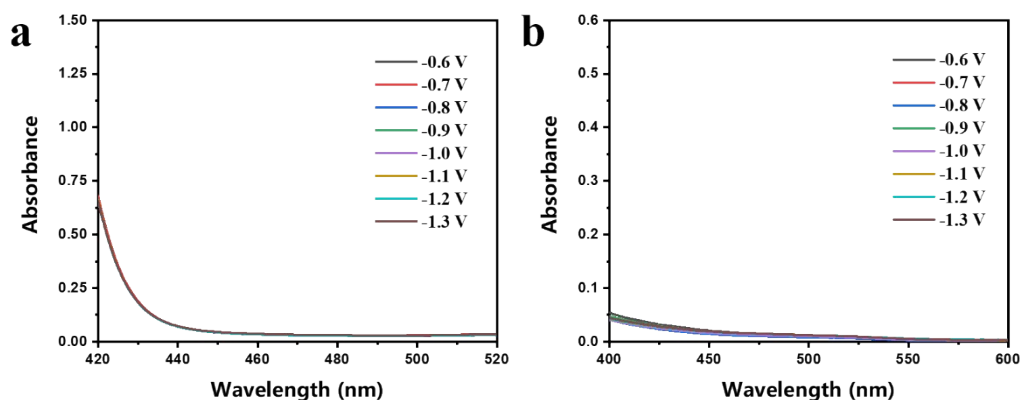

**Fig. S14** UV-Vis absorption spectra of the 0.1 M KOH electrolytes with 0.05 M  $\text{KNO}_3$  (after electrolysis with Co catalysts at different applied potentials for 1 h) after incubated for 10 min at room temperature.

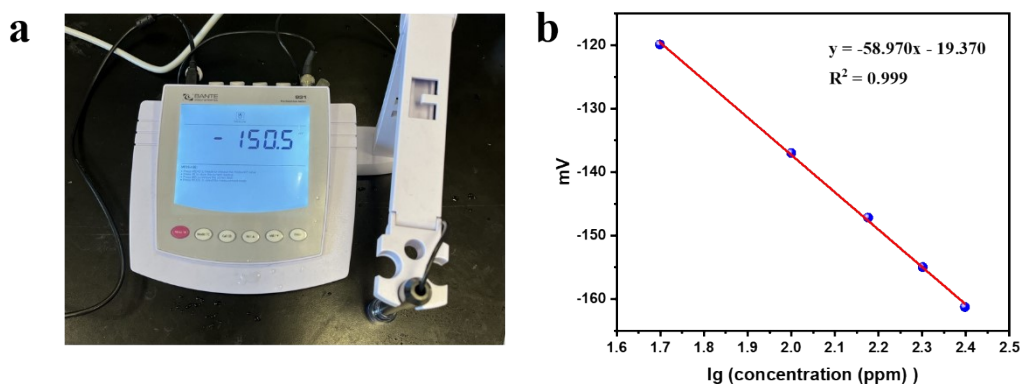

**Fig. S15** (a) Photograph of ammonia-sensitive electrode. (b) The standard curve of  $\text{NH}_4\text{Cl}$  solution with different concentration detected by ammonia-sensitive electrode.

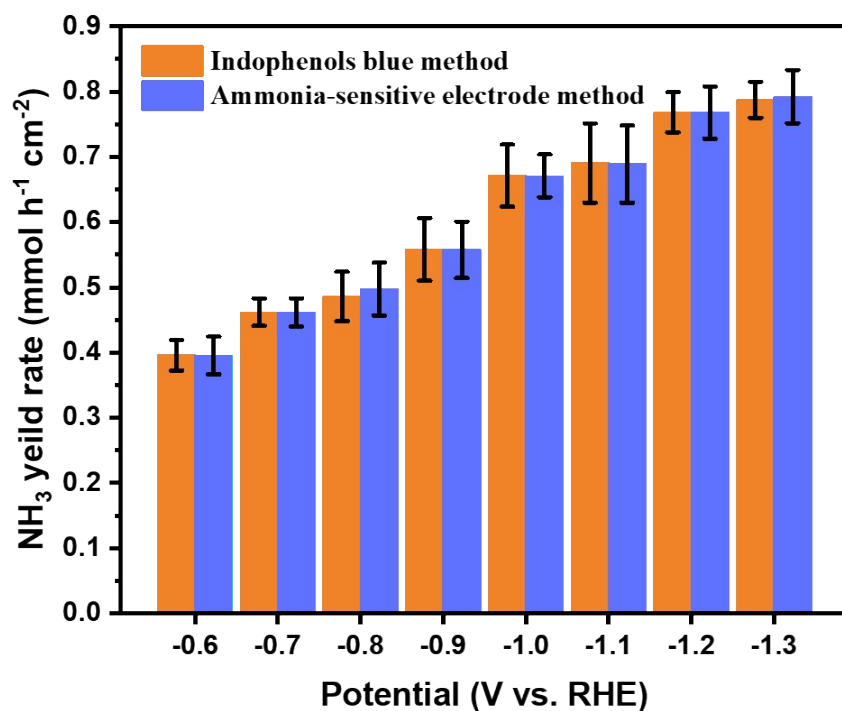

**Fig. S16** Comparison of ammonia calibrated by indophenols blue method and ammonia-sensitive electrode method. (Error bars was derived from experimental results from three independent samples)

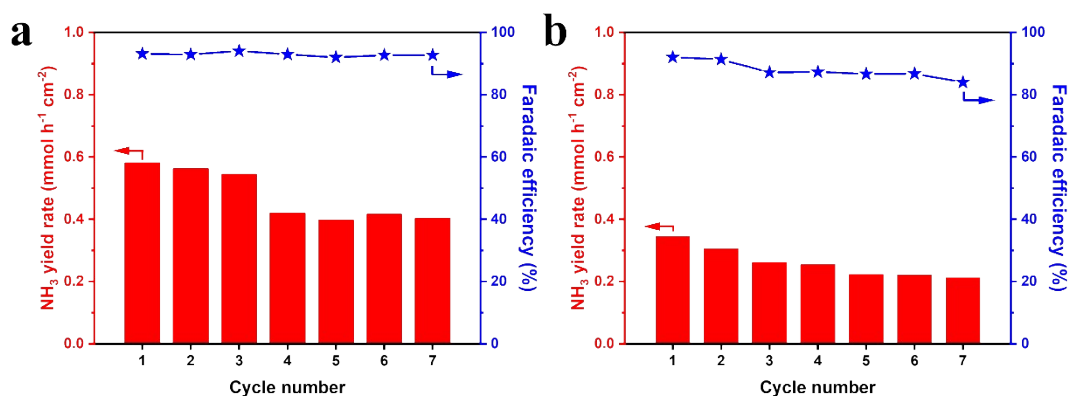

**Fig. S17**  $\text{NH}_3$  yield rates and FEs of recycling tests over (a) CoB<sub>x</sub> and (b) Co at -0.9 V vs. RHE in 0.1 M KOH with 0.05 M KNO<sub>3</sub>.

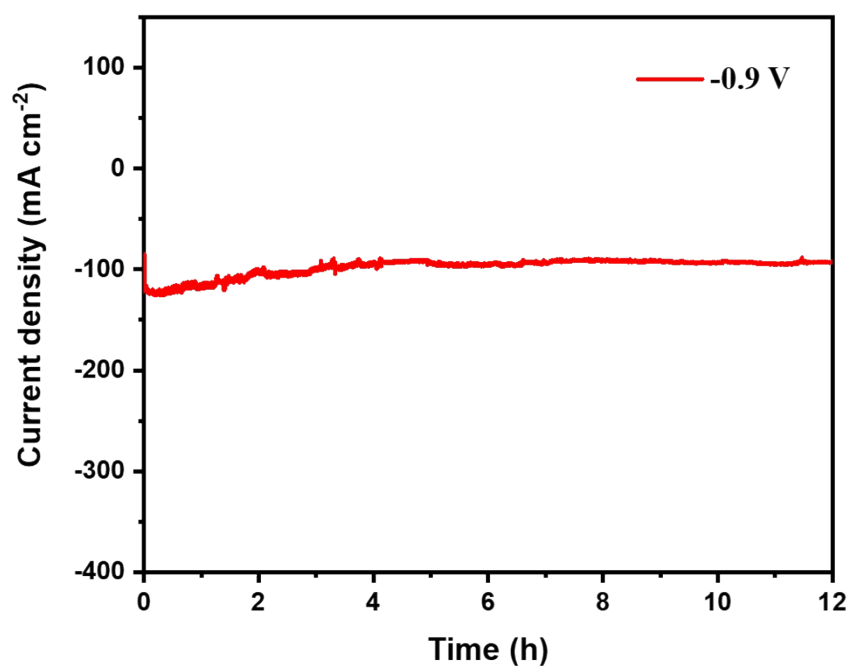

**Fig. S18** Chronoamperometric curve of CoB<sub>x</sub> for 12 h at -0.9 V vs. RHE in 150 mL of 0.1 M KOH with 0.05 M KNO<sub>3</sub>.

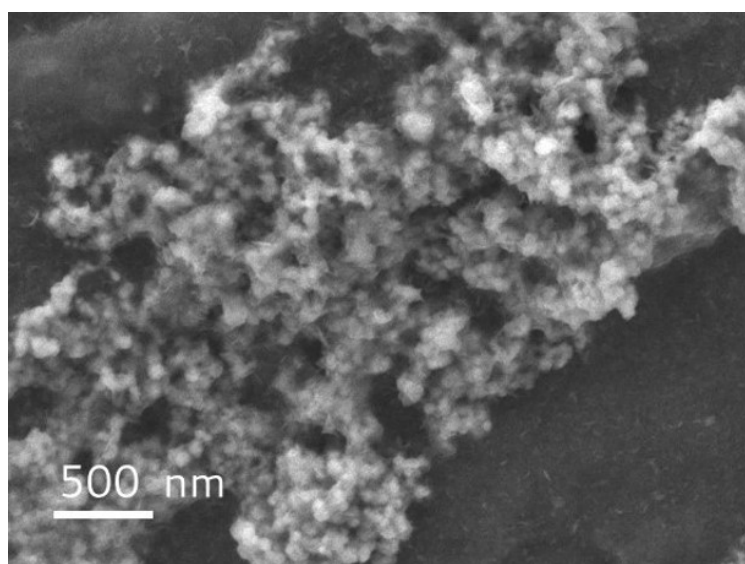

**Fig. S19** SEM image of CoB<sub>x</sub> after successive cycling electrolysis at the potential of -0.9 V vs. RHE.

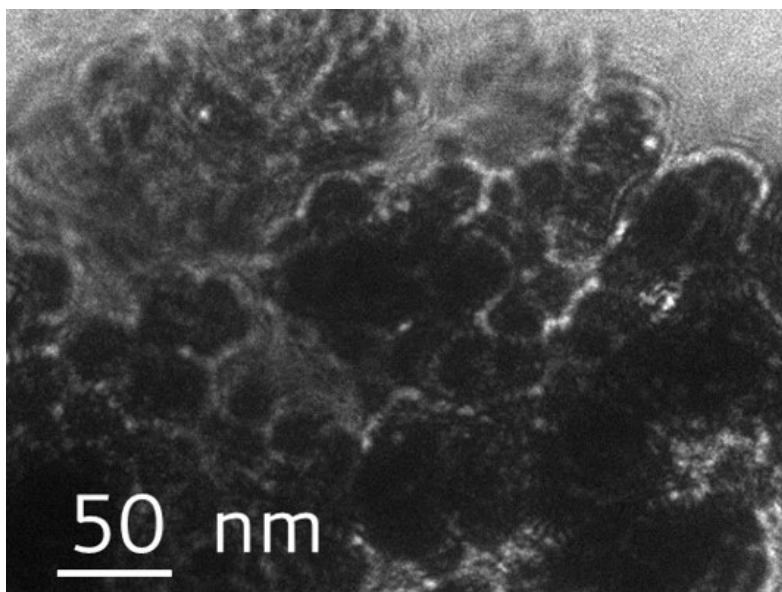

**Fig. S20** TEM image of  $\text{CoB}_x$  after successive cycling electrolysis at a potential of -0.9 vs. RHE.

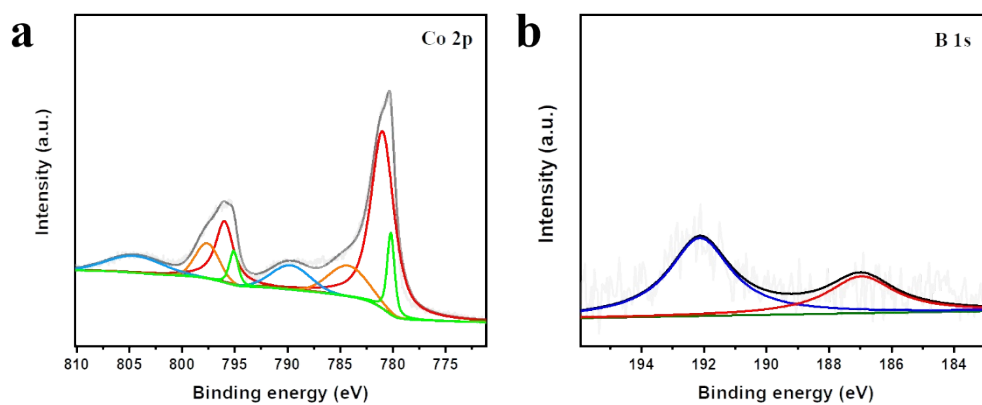

**Fig. S21** High-resolution XPS spectra of (a) Co 2p and (b) B 1s of  $\text{CoB}_x$  after electrolysis at a potential of -0.9 vs. RHE.

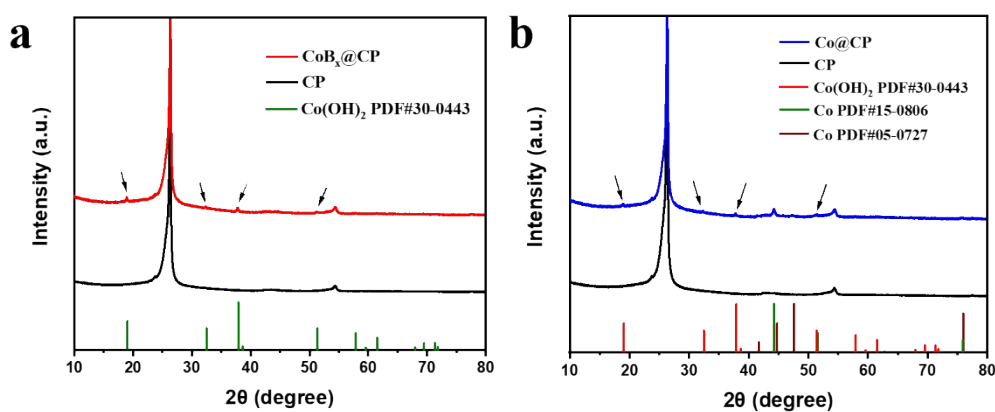

**Fig. S22** XRD patterns of (a)  $\text{CoB}_x$  and (b) Co after electrolysis at a potential of -0.9 vs. RHE in 0.1 M KOH with 0.05 M  $\text{KNO}_3$ .

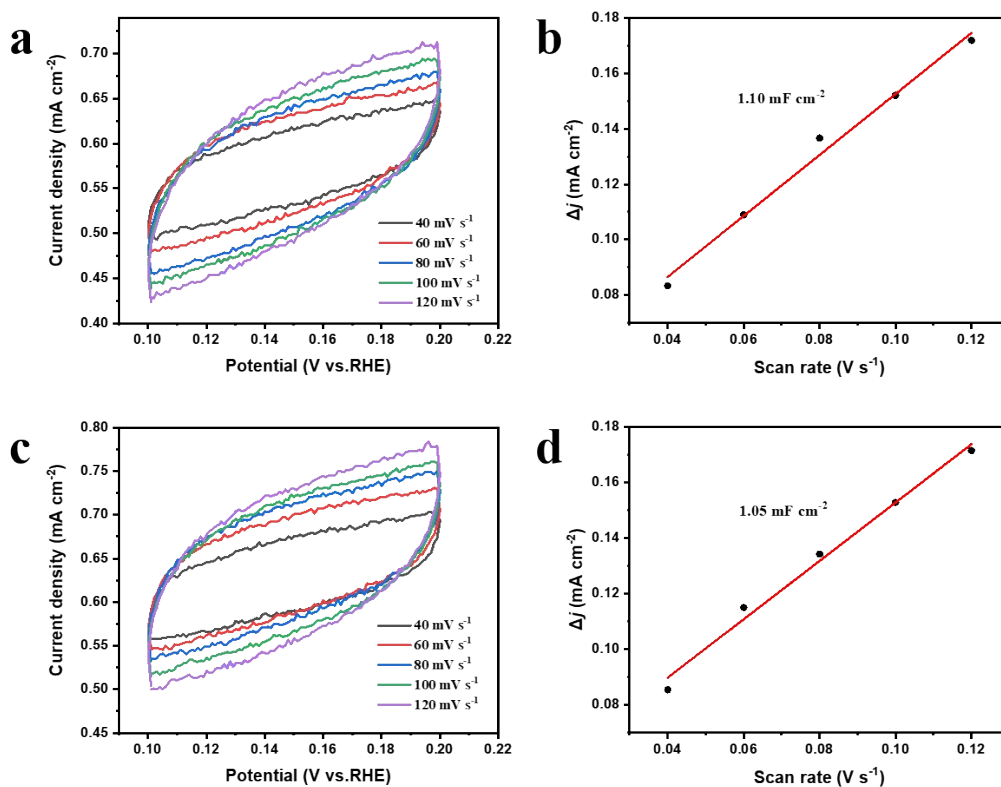

**Fig. S23** CV curves of (a)  $\text{CoB}_x$ , and (c) Co at different scan rates (40, 60, 80, 100, and 120  $\text{mV s}^{-1}$ ) in the potential range of 0.1-0.2 V vs. RHE. (b and d) corresponding current density variation plotted against the scan rate, fitted to a linear regression, enables the estimation of the double-layer capacitance ( $C_{dl}$ ).

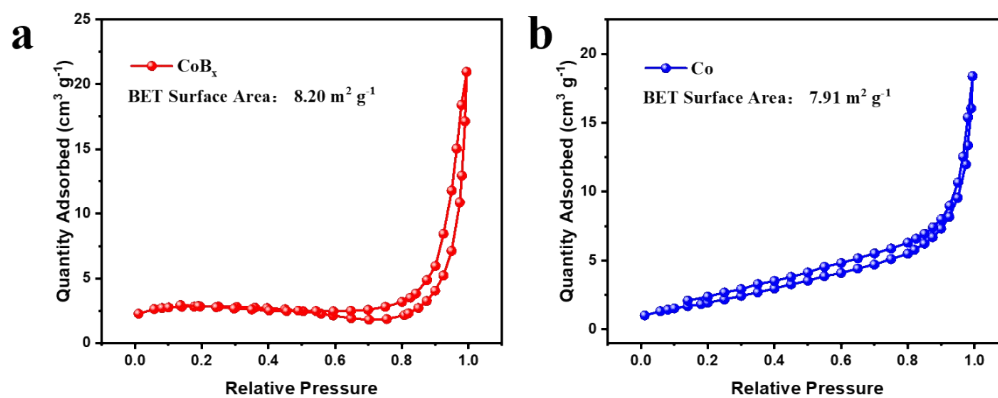

**Fig. S24** Nitrogen adsorption-desorption isotherms of (a) CoB<sub>x</sub> (b) Co.

**Table S1.** Elemental compositions of CoB<sub>x</sub> nanoparticles quantified by ICP-AES.

| Composition (wt. %) | B    | Co    |
|---------------------|------|-------|
|                     | 9.95 | 86.39 |

**Table S2.** Atomic concentration of CoB<sub>x</sub> nanoparticles from the XPS results.

| Atomic (%) | Co    | B     | O     |
|------------|-------|-------|-------|
|            | 19.04 | 17.93 | 38.13 |

**Table S3** Comparison of NH<sub>3</sub> yield rate and Faradaic efficiency (NH<sub>3</sub>) between CoB<sub>x</sub>, and recently-reported electrocatalysts.

| Materials                               | Electrolyte                                                                   | NH <sub>3</sub> yield rates @ Potential<br>(V vs. RHE)                   | FE(NH <sub>3</sub> ) @ Potential<br>(V vs. RHE) | Ref.               |
|-----------------------------------------|-------------------------------------------------------------------------------|--------------------------------------------------------------------------|-------------------------------------------------|--------------------|
| CoB <sub>x</sub>                        |                                                                               | 0.558 ± 0.048 mmol h <sup>-1</sup> cm <sup>-2</sup> @-0.9                |                                                 |                    |
|                                         | 0.1 M KOH +                                                                   | 1.395 ± 0.120 mmol h <sup>-1</sup> mg <sub>cat</sub> <sup>-1</sup> @-0.9 | 94.00 ± 1.67 % @-0.9                            | This               |
|                                         | 0.05 M NO <sub>3</sub> <sup>-</sup>                                           | 0.787 ± 0.028 mmol h <sup>-1</sup> cm <sup>-2</sup> @-1.3                | 89.99 ± 2.33 % @-1.3                            | work               |
|                                         |                                                                               | 1.968 ± 0.069 mmol h <sup>-1</sup> mg <sub>cat</sub> <sup>-1</sup> @-1.3 |                                                 |                    |
| PTCDA/O-                                | 0.1 M PBS + 500                                                               | 436 ± 85 μg h <sup>-1</sup> cm <sup>-2</sup> /                           |                                                 |                    |
| Cu                                      | ppm NO <sub>3</sub> <sup>-</sup>                                              | 0.0256 ± 0.005 mmol h <sup>-1</sup> cm <sup>-2</sup>                     | 77 ± 3 %                                        | 2020 <sup>7</sup>  |
| Cu/Cu <sub>2</sub> O                    | 0.5 M Na <sub>2</sub> SO <sub>4</sub> +                                       | 0.2447 mmol h <sup>-1</sup> cm <sup>-2</sup>                             | 95.8 %                                          | 2020 <sup>5</sup>  |
| NWAs                                    | 200 ppm NO <sub>3</sub> <sup>-</sup>                                          |                                                                          |                                                 |                    |
| Ir nanotubes                            | 0.1 M HClO <sub>4</sub> +<br>1 M NaNO <sub>3</sub>                            | 0.0542 mmol h <sup>-1</sup> mg <sub>cat</sub> <sup>-1</sup>              | 84.7 %                                          | 2020 <sup>8</sup>  |
| CoP PANs                                | 0.5 M K <sub>2</sub> SO <sub>4</sub> +<br>0.05 M KNO <sub>3</sub>             | 0.1296 mmol h <sup>-1</sup> cm <sup>-2</sup>                             | 94.24 ± 2.8 %                                   | 2021 <sup>9</sup>  |
| TiO <sub>2-x</sub>                      | 0.5 M Na <sub>2</sub> SO <sub>4</sub> +<br>50ppm NaNO <sub>3</sub>            | 0.045 mmol h <sup>-1</sup> mg <sub>cat</sub> <sup>-1</sup>               | 85 %                                            | 2020 <sup>10</sup> |
| PP-Co/CP                                | 0.1 M NaOH +<br>0.1 M NaNO <sub>3</sub>                                       | 1.1 mmol h <sup>-1</sup> mg <sub>cat</sub> <sup>-1</sup>                 | 90.1 %                                          | 2022 <sup>11</sup> |
| Fe SAC                                  | 0.10 M K <sub>2</sub> SO <sub>4</sub> +<br>0.5 M NO <sub>3</sub> <sup>-</sup> | 0.46 mmol h <sup>-1</sup> cm <sup>-2</sup>                               | ~ 75 %                                          | 2021 <sup>12</sup> |
| Cu <sub>50</sub> Ni <sub>50</sub> alloy | 1 M KOH +<br>0.1 M KNO <sub>3</sub>                                           |                                                                          | ~ 99 ± 1 %                                      | 2020 <sup>13</sup> |
| Ni <sub>3</sub> B@NiB <sub>2.74</sub>   | 0.1 M KOH +<br>0.1 M NO <sub>3</sub> <sup>-</sup>                             | 198.3 μmol h <sup>-1</sup> cm <sup>-2</sup>                              | 100 %                                           | 2021 <sup>2</sup>  |

## References

1. J. F. Gao, J. F. Hou and L. B. Kong, *Part. Part. Syst. Char.* 2021, **38**, 2100020.
2. L. Li, C. Tang, X. Cui, Y. Zheng, X. Wang, H. Xu, S. Zhang, T. Shao, K. Davey and S. Z. Qiao, *Angew. Chem. Int. Ed.*, 2021, **60**, 14131-14137.
3. S. Xie, F. Li, S. Xu, J. Li and W. Zeng, *Chin. J. Catal.*, 2019, **40**, 1205-1211.
4. Z. Fang, P. Wu, Y. Qian and G. Yu, *Angew. Chem. Int. Ed.*, 2021, **60**, 4275-4281.
5. Y. Wang, W. Zhou, R. Jia, Y. Yu and B. Zhang, *Angew. Chem. Int. Ed.*, 2020, **59**, 5350-5354.
6. Y. Wu, Z. Jiang, Z. Lin, Y. Liang and H. Wang, *Nat. Sustainability*, 2021, **4**, 725-730.
7. G.-F. Chen, Y. Yuan, H. Jiang, S.-Y. Ren, L.-X. Ding, L. Ma, T. Wu, J. Lu and H. Wang, *Nat. Energy*, 2020, **5**, 605-613.
8. J. Y. Zhu, Q. Xue, Y. Y. Xue, Y. Ding, F. M. Li, P. Jin, P. Chen and Y. Chen, *ACS Appl. Mater. Interfaces*, 2020, **12**, 14064-14070.
9. Y. Jia, Y. G. Ji, Q. Xue, F. M. Li, G. T. Zhao, P. J. Jin, S. N. Li and Y. Chen, *ACS Appl. Mater. Interfaces*, 2021, **13**, 45521-45527.
10. R. Jia, Y. Wang, C. Wang, Y. Ling, Y. Yu and B. Zhang, *ACS Catal.*, 2020, **10**, 3533-3540.
11. Q. Chen, J. Liang, Q. Liu, K. Dong, L. Yue, P. Wei, Y. Luo, Q. Liu, N. Li, B. Tang, A. A. Alshehri, M. S. Hamdy, Z. Jiang and X. Sun, *Chem. Commun.*, 2022, **58**, 4259-4262.
12. Z. Y. Wu, M. Karamad, X. Yong, Q. Huang, D. A. Cullen, P. Zhu, C. Xia, Q. Xiao, M. Shakouri, F. Y. Chen, J. Y. T. Kim, Y. Xia, K. Heck, Y. Hu, M. S. Wong, Q. Li, I. Gates, S. Siahrostami and H. Wang, *Nat. Commun.*, 2021, **12**, 2870.
13. Y. Wang, A. Xu, Z. Wang, L. Huang, J. Li, F. Li, J. Wicks, M. Luo, D. H. Nam, C. S. Tan, Y. Ding, J. Wu, Y. Lum, C. T. Dinh, D. Sinton, G. Zheng and E. H. Sargent, *J. Am. Chem. Soc.*, 2020, **142**, 5702-5708.
